# Supplementary material for: A pectin-based artificial nociceptor enabling actual tactile perception
Source: Royal Society of Chemistry journal article supplement (doi:10.1039/d4tc03877k), 2024-01-01
Supplement: d4tc03877k1.pdf [file d4tc03877k1.pdf]

## Electronic Supplementary Material (ESI) for Journal of Materials Chemistry C.

*Supporting Information*

### **A pectin-based artificial nociceptor enabled actual tactile perception**

Linqing Zhou<sup>a</sup>, Junqing Wei<sup>a, \*</sup>, Zewen Li<sup>a</sup>, Kuibo Lan<sup>b</sup>, Guoxuan Qin<sup>b</sup>, Fang Wang<sup>a, \*</sup>, Kailiang Zhang<sup>a, \*</sup>

<sup>a</sup> Tianjin Key Laboratory of Film Electronic & Communication Devices, School of Integrated Circuit Science and Engineering, Tianjin University of Technology, Tianjin 300384, P. R. China

<sup>b</sup> School of Microelectronics, Tianjin University, Tianjin 300072, P. R. China

**E-mail address:** weijunqing0907@163.com (Junqing Wei), fwang75@163.com (Fang Wang),

kailiang\_zhang2007@163.com (Kailiang Zhang)

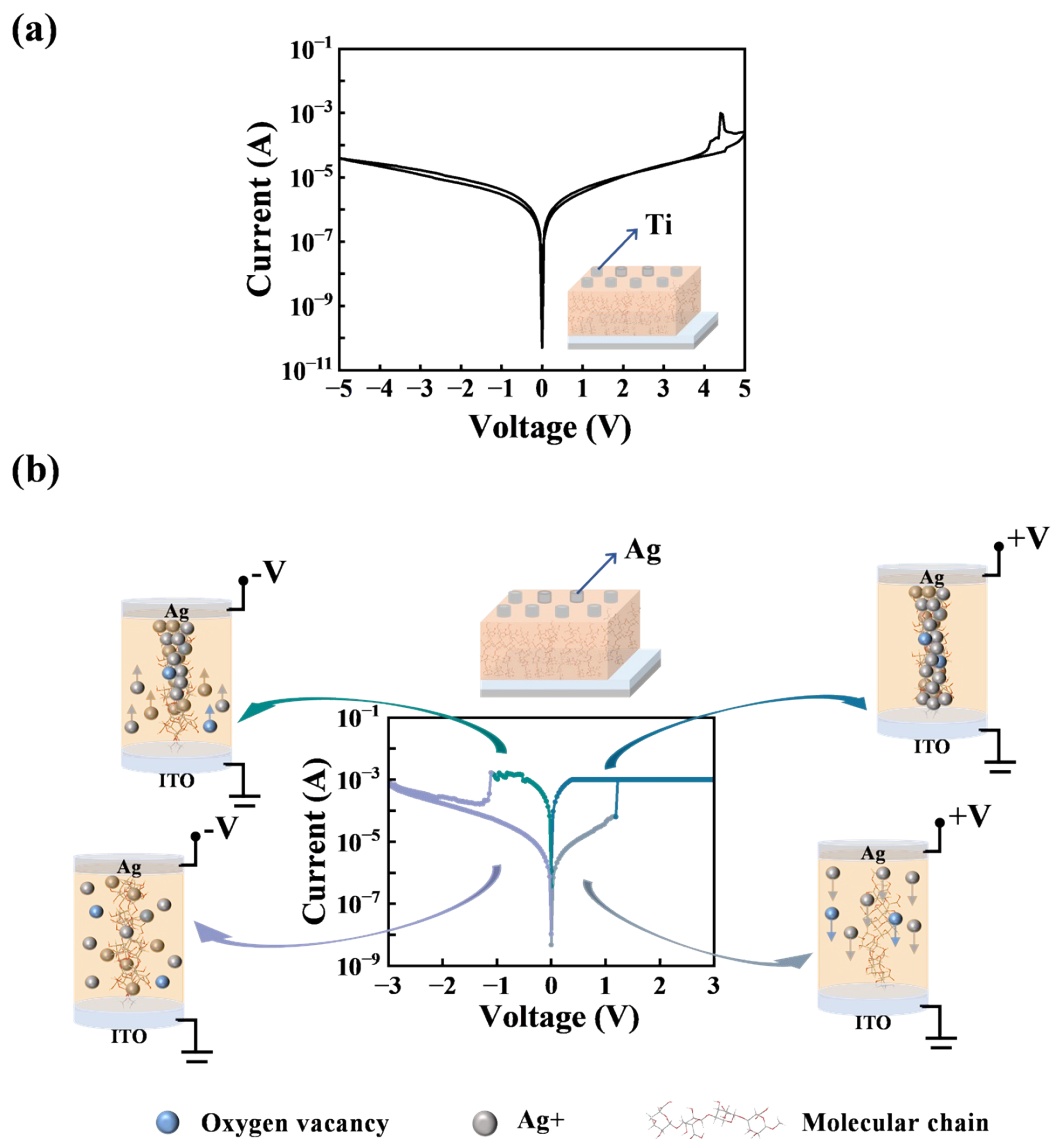

**Figure. S1** (a) I-V curve of Ti/pectin/ITO memristor device (inset is device structure). (b) Working mechanism of the Ag/pectin/ITO device.

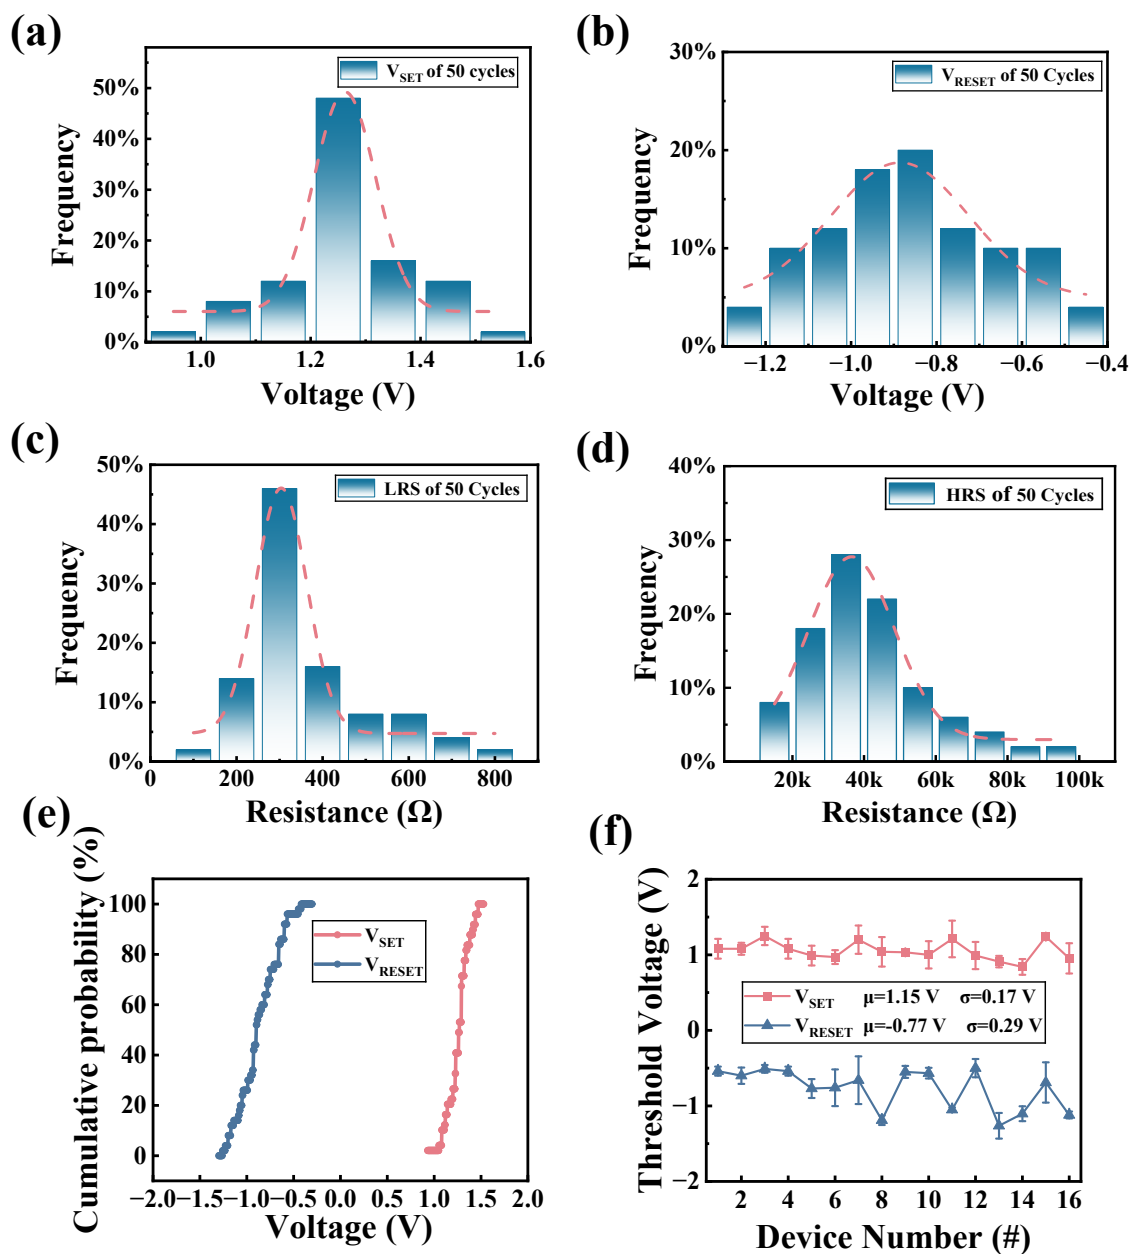

**Figure. S2** The statistical results of (a) SET voltage, (b) RESET voltage, (c) low resistance state (LRS) and (d) high resistance state (HRS) distribution of Ag/pectin/ITO memristor devices. (e) Cumulative probability distribution of  $V_{SET}$  and  $V_{RESET}$ . (f) The average threshold voltage and standard deviation of 16 Ag/pectin/ITO devices.

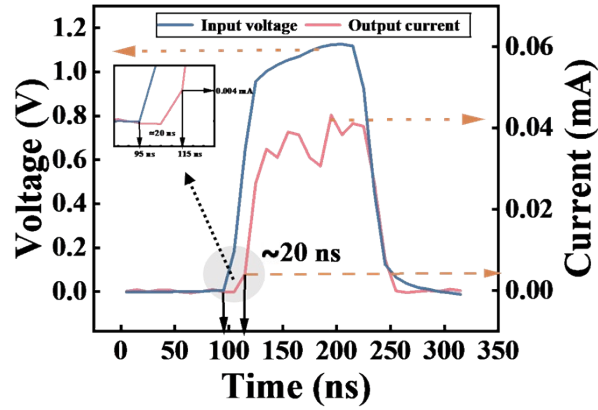

**Figure. S3** Transient response of Ag/pectin/ITO memristor.

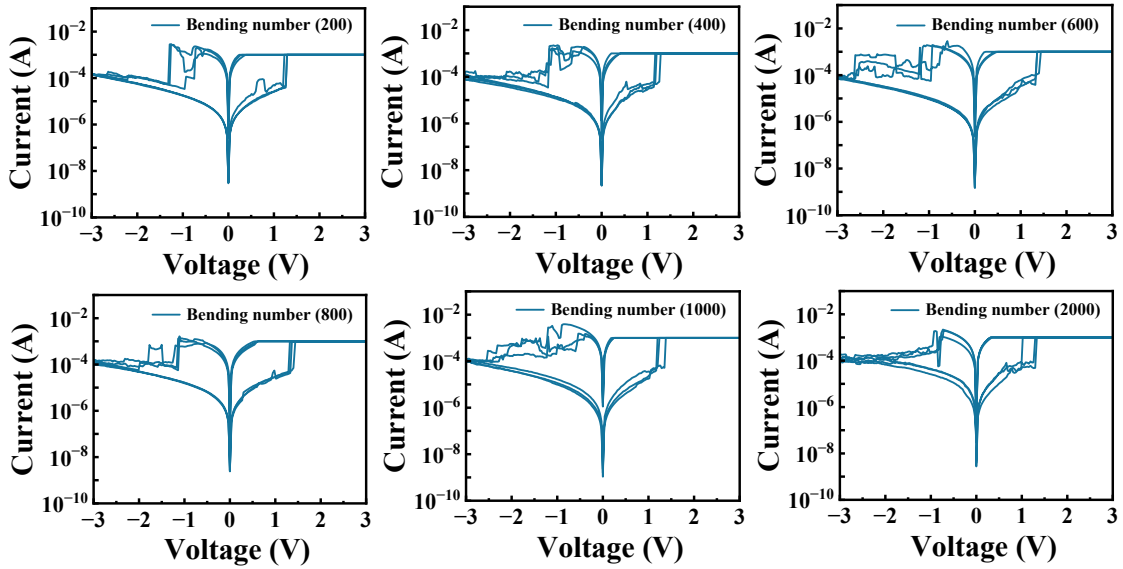

**Figure. S4** Device performance after bending (a) 200 times, (b) 400 times, (c) 600 times, (d) 800 times, (e) 1000 times and (f) 2000 times, respectively.

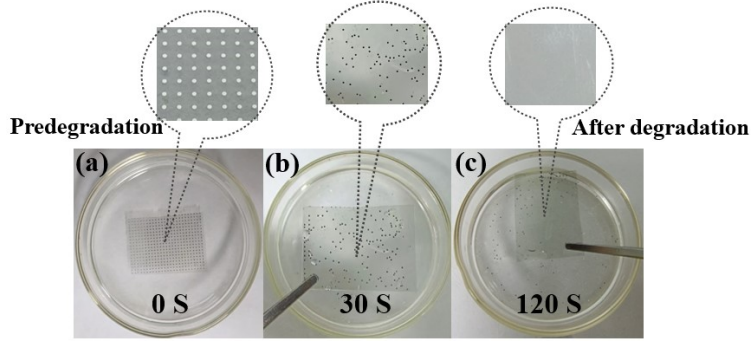

**Figure. S5** Photos of Ag/pectin/ITO/PET devices after immersing in deionized water for (a) 0 s, (b) 30 s and (c) 120 s at room temperature.

**Table 1** The device performance of biomaterial based memristors.

| Device structure:   | $V_{SET}/V_{RESET}$ | ON/OFF ratio | Nociceptor  |             |                 |                | Reference |
|---------------------|---------------------|--------------|-------------|-------------|-----------------|----------------|-----------|
|                     |                     |              | Thres -hold | Relax-ation | Non-adaptatio-n | Sensiti-zation |           |
| Ag /Chitosan/W      | 15.00/-<br>15.00 V  | $10^5$       | —           | —           | —               | —              | 1         |
| Ag/Dead leaves/ITO  | 1.00/-<br>1.50 V    | 50           | —           | —           | —               | —              | 2         |
| Al/Eggshell/ITO     | 2.42/-<br>1.12 V    | $10^3$       | —           | —           | —               | —              | 3         |
| Ag/Lotus leaves/ITO | 5.00/-<br>3.00 V    | 40           | —           | —           | —               | —              | 4         |
| Ag/Pectin/ITO       | 1.20/-<br>0.87 V    | $>10^2$      | √           | √           | √               | √              | This work |
